# Supplementary material for: Comparative Plastid Genomics of Non-Photosynthetic Chrysophytes: Genome Reduction and Compaction
Source: PubMed Central journal article supplement (PMC7511666; doi:10.3389/fpls.2020.572703), 2020-09-10

● Photosynthetic lineage  
● Non-Photosynthetic lineage

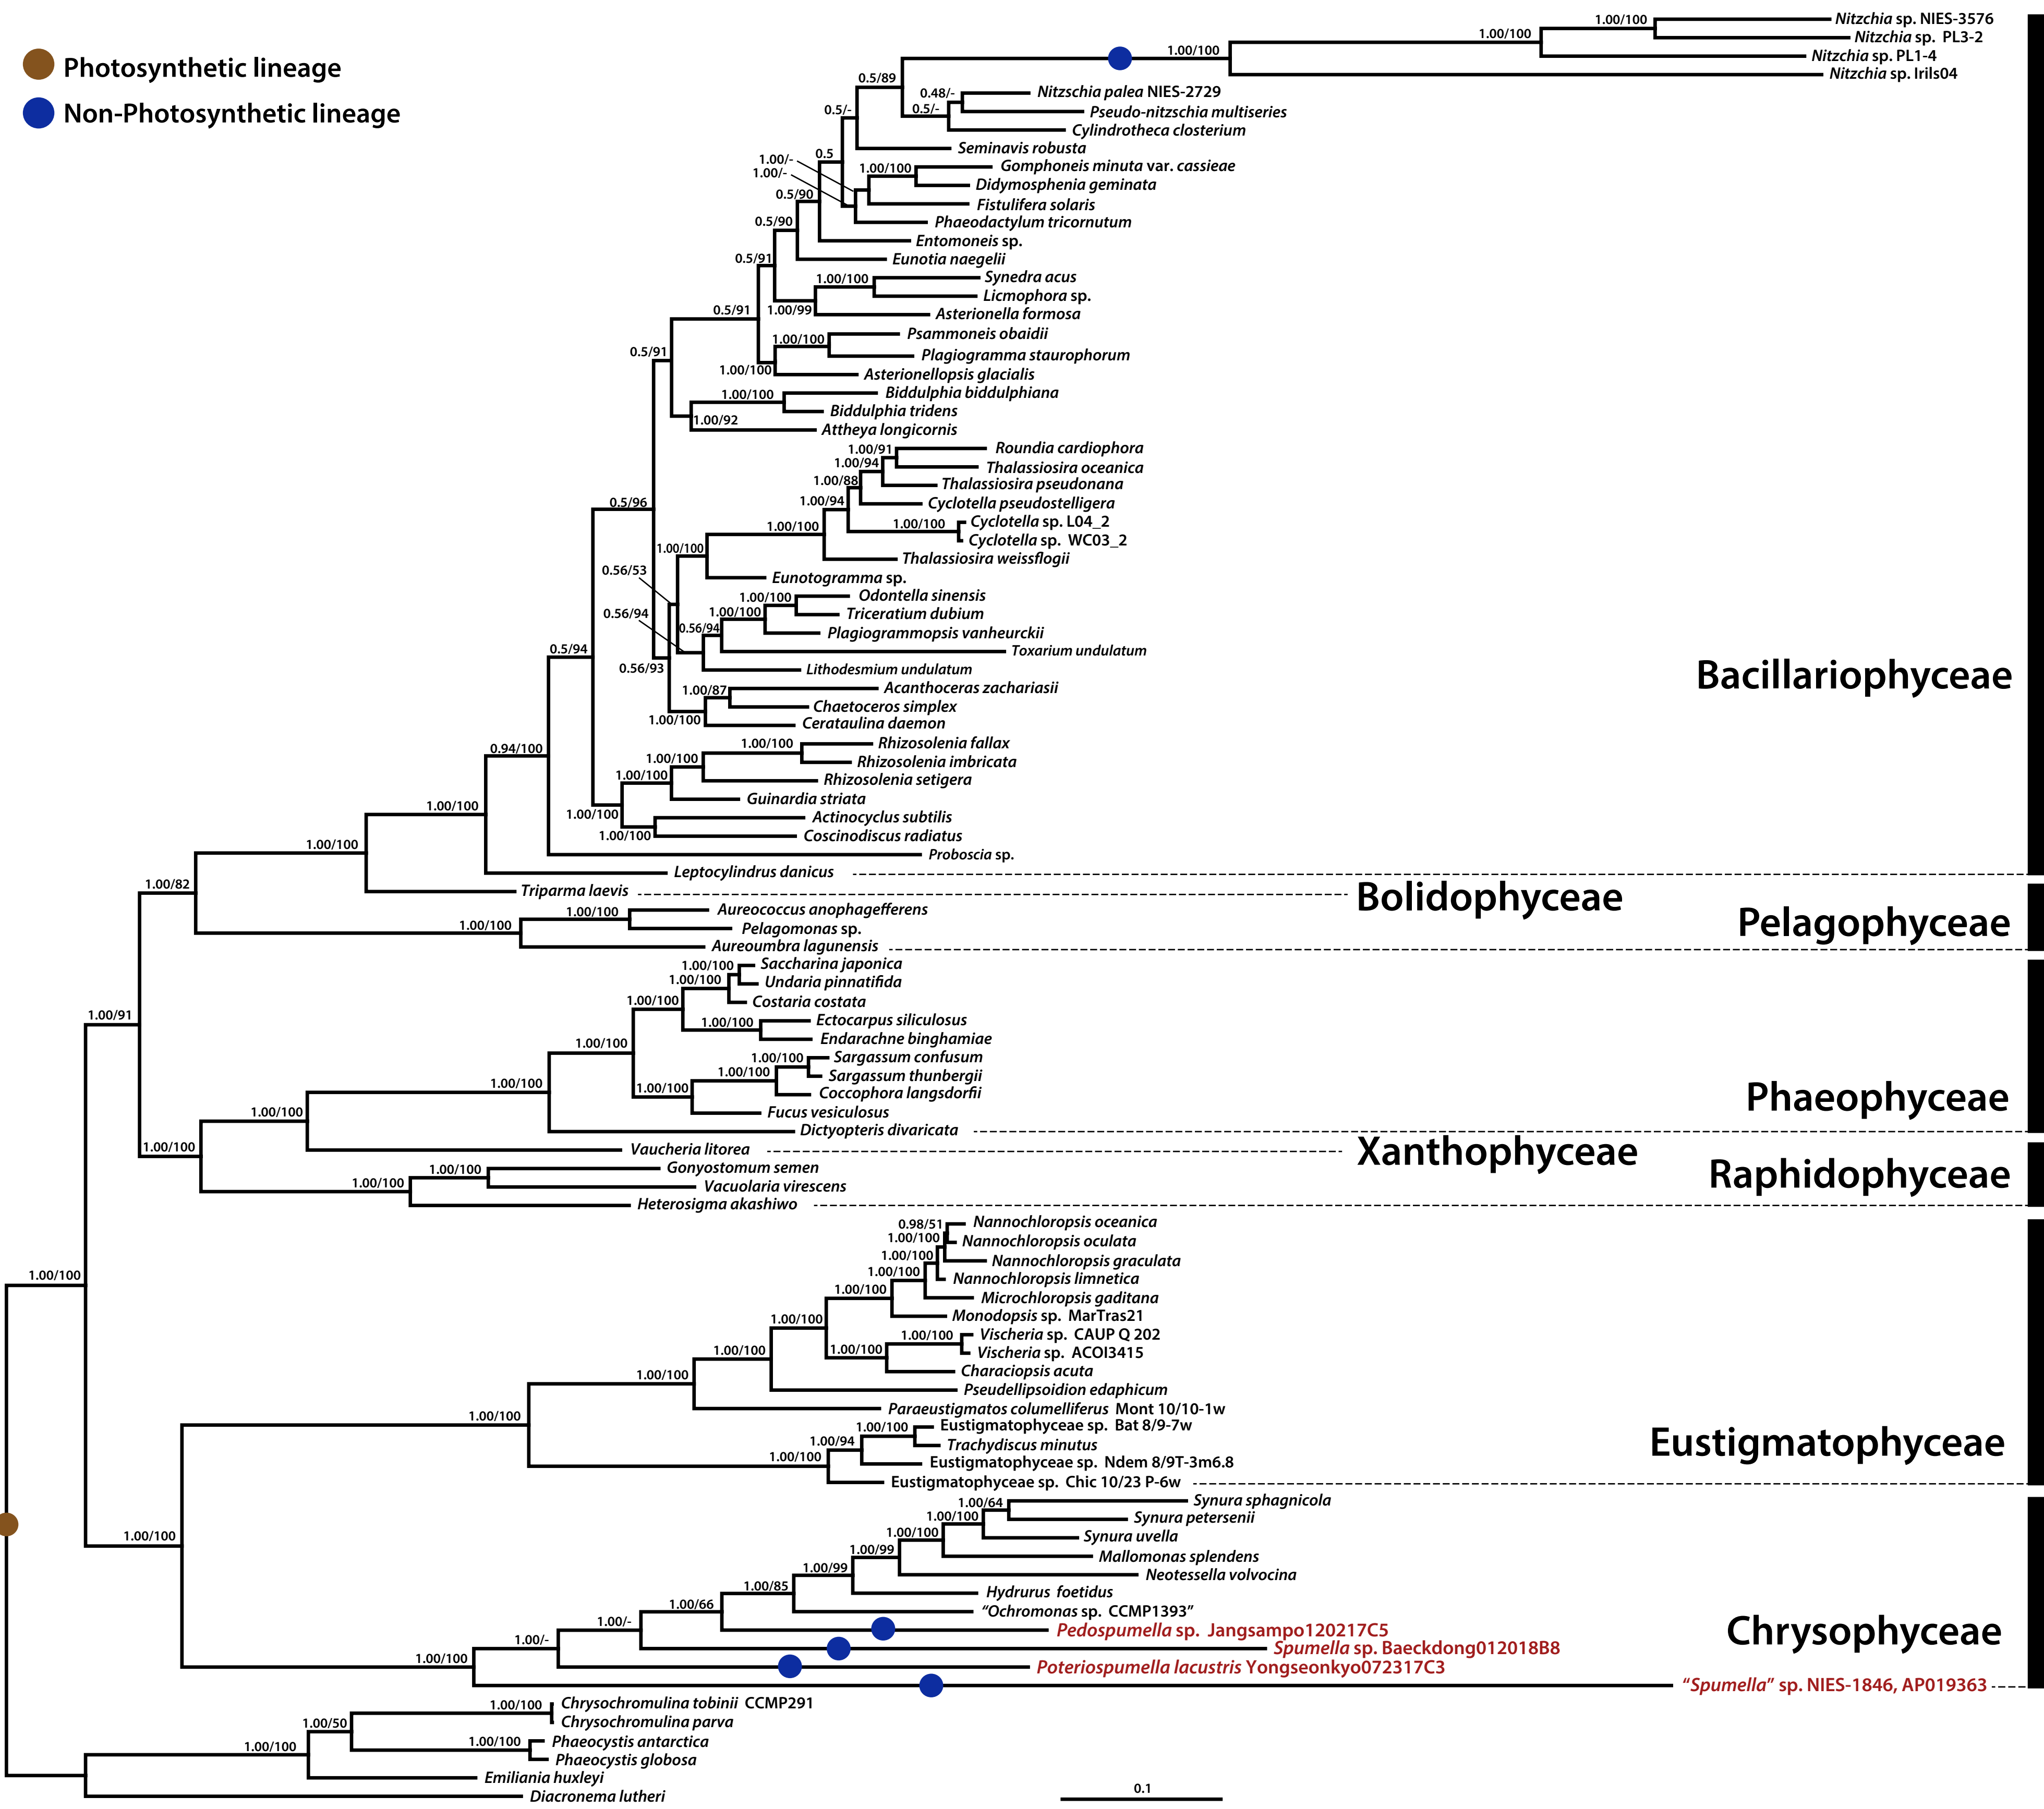

Supplement: DataSheet_1.pdf [file DataSheet_1.pdf]
