# Supplementary material for: Comparative Plastid Genomics of Non-Photosynthetic Chrysophytes: Genome Reduction and Compaction
Source: PubMed Central journal article supplement (PMC7511666; doi:10.3389/fpls.2020.572703), 2020-09-10

# Nuclear SSU rDNA

- Phototrophic lineage
- Mixotrophic lineage
- Heterotrophic lineage

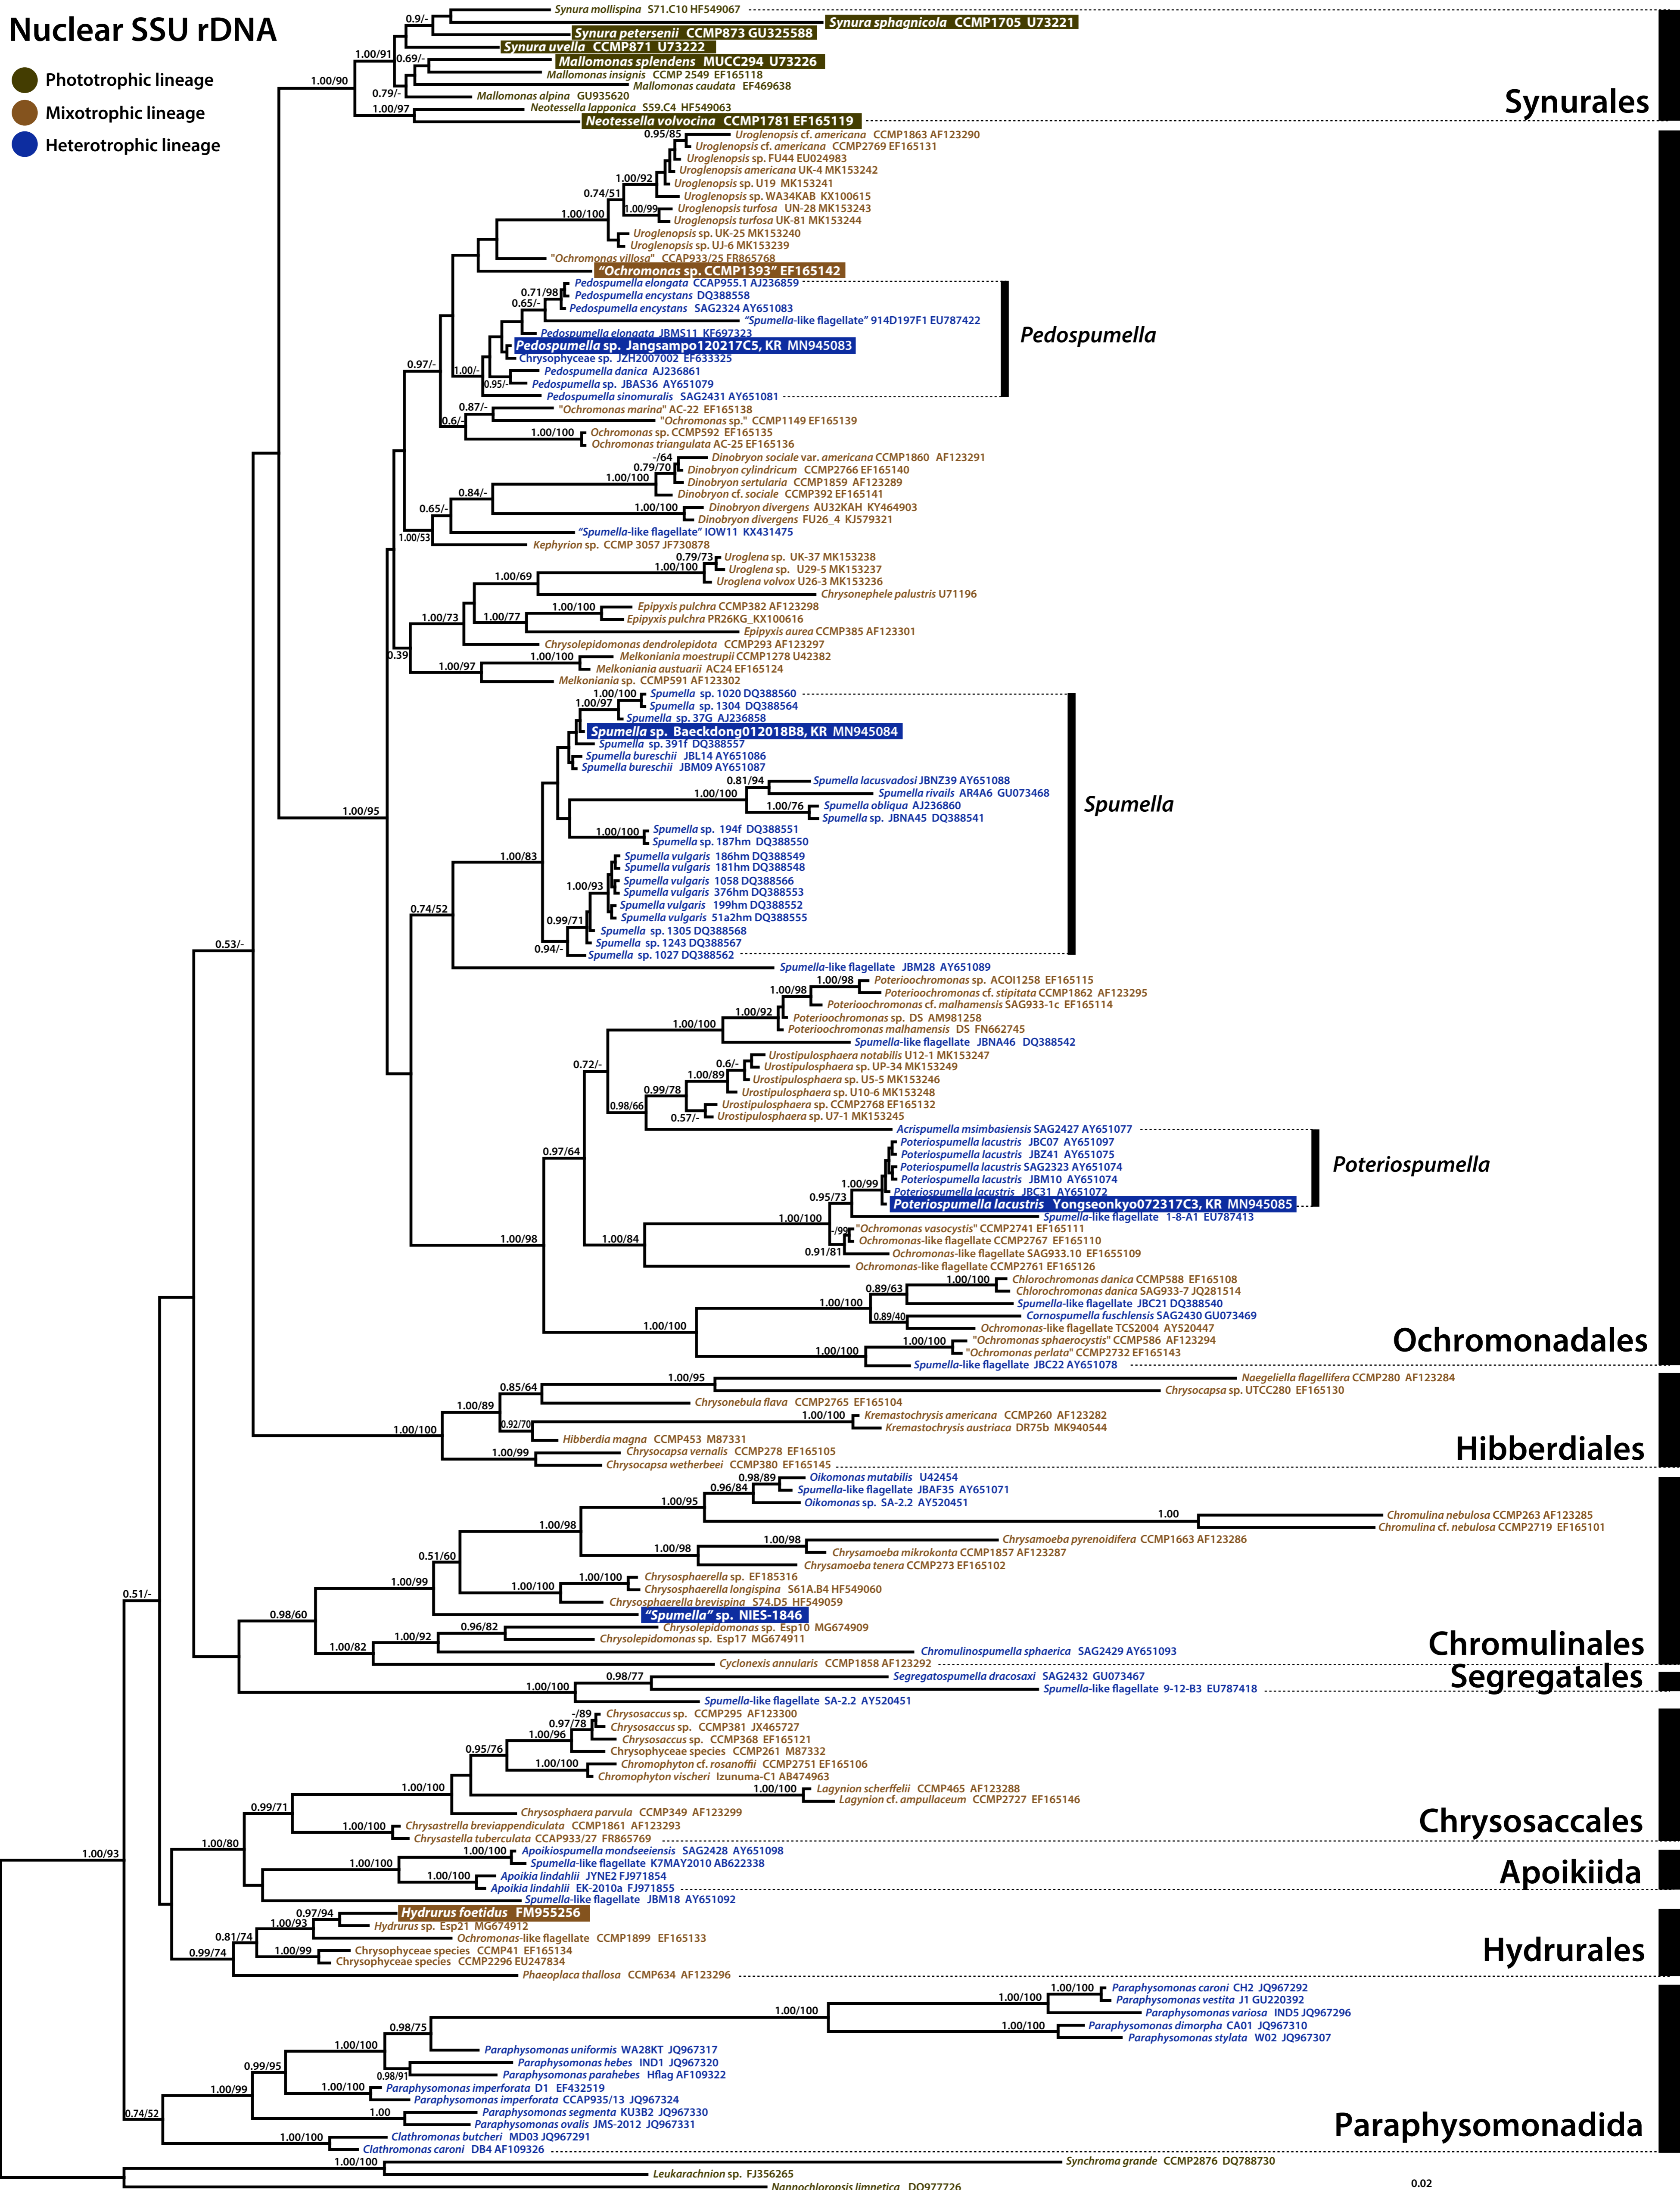

Supplement: DataSheet_2.pdf [file DataSheet_2.pdf]
