# Supplementary material for: Comparative Plastid Genomics of Non-Photosynthetic Chrysophytes: Genome Reduction and Compaction
Source: PubMed Central journal article supplement (PMC7511666; doi:10.3389/fpls.2020.572703), 2020-09-10
Supplement: DataSheet_3.pdf [file DataSheet_3.pdf]

IQ-tree  
PMSF model  
(the LG+F+G tree as the guide tree)

- Photosynthetic lineage
- Non-Photosynthetic lineage

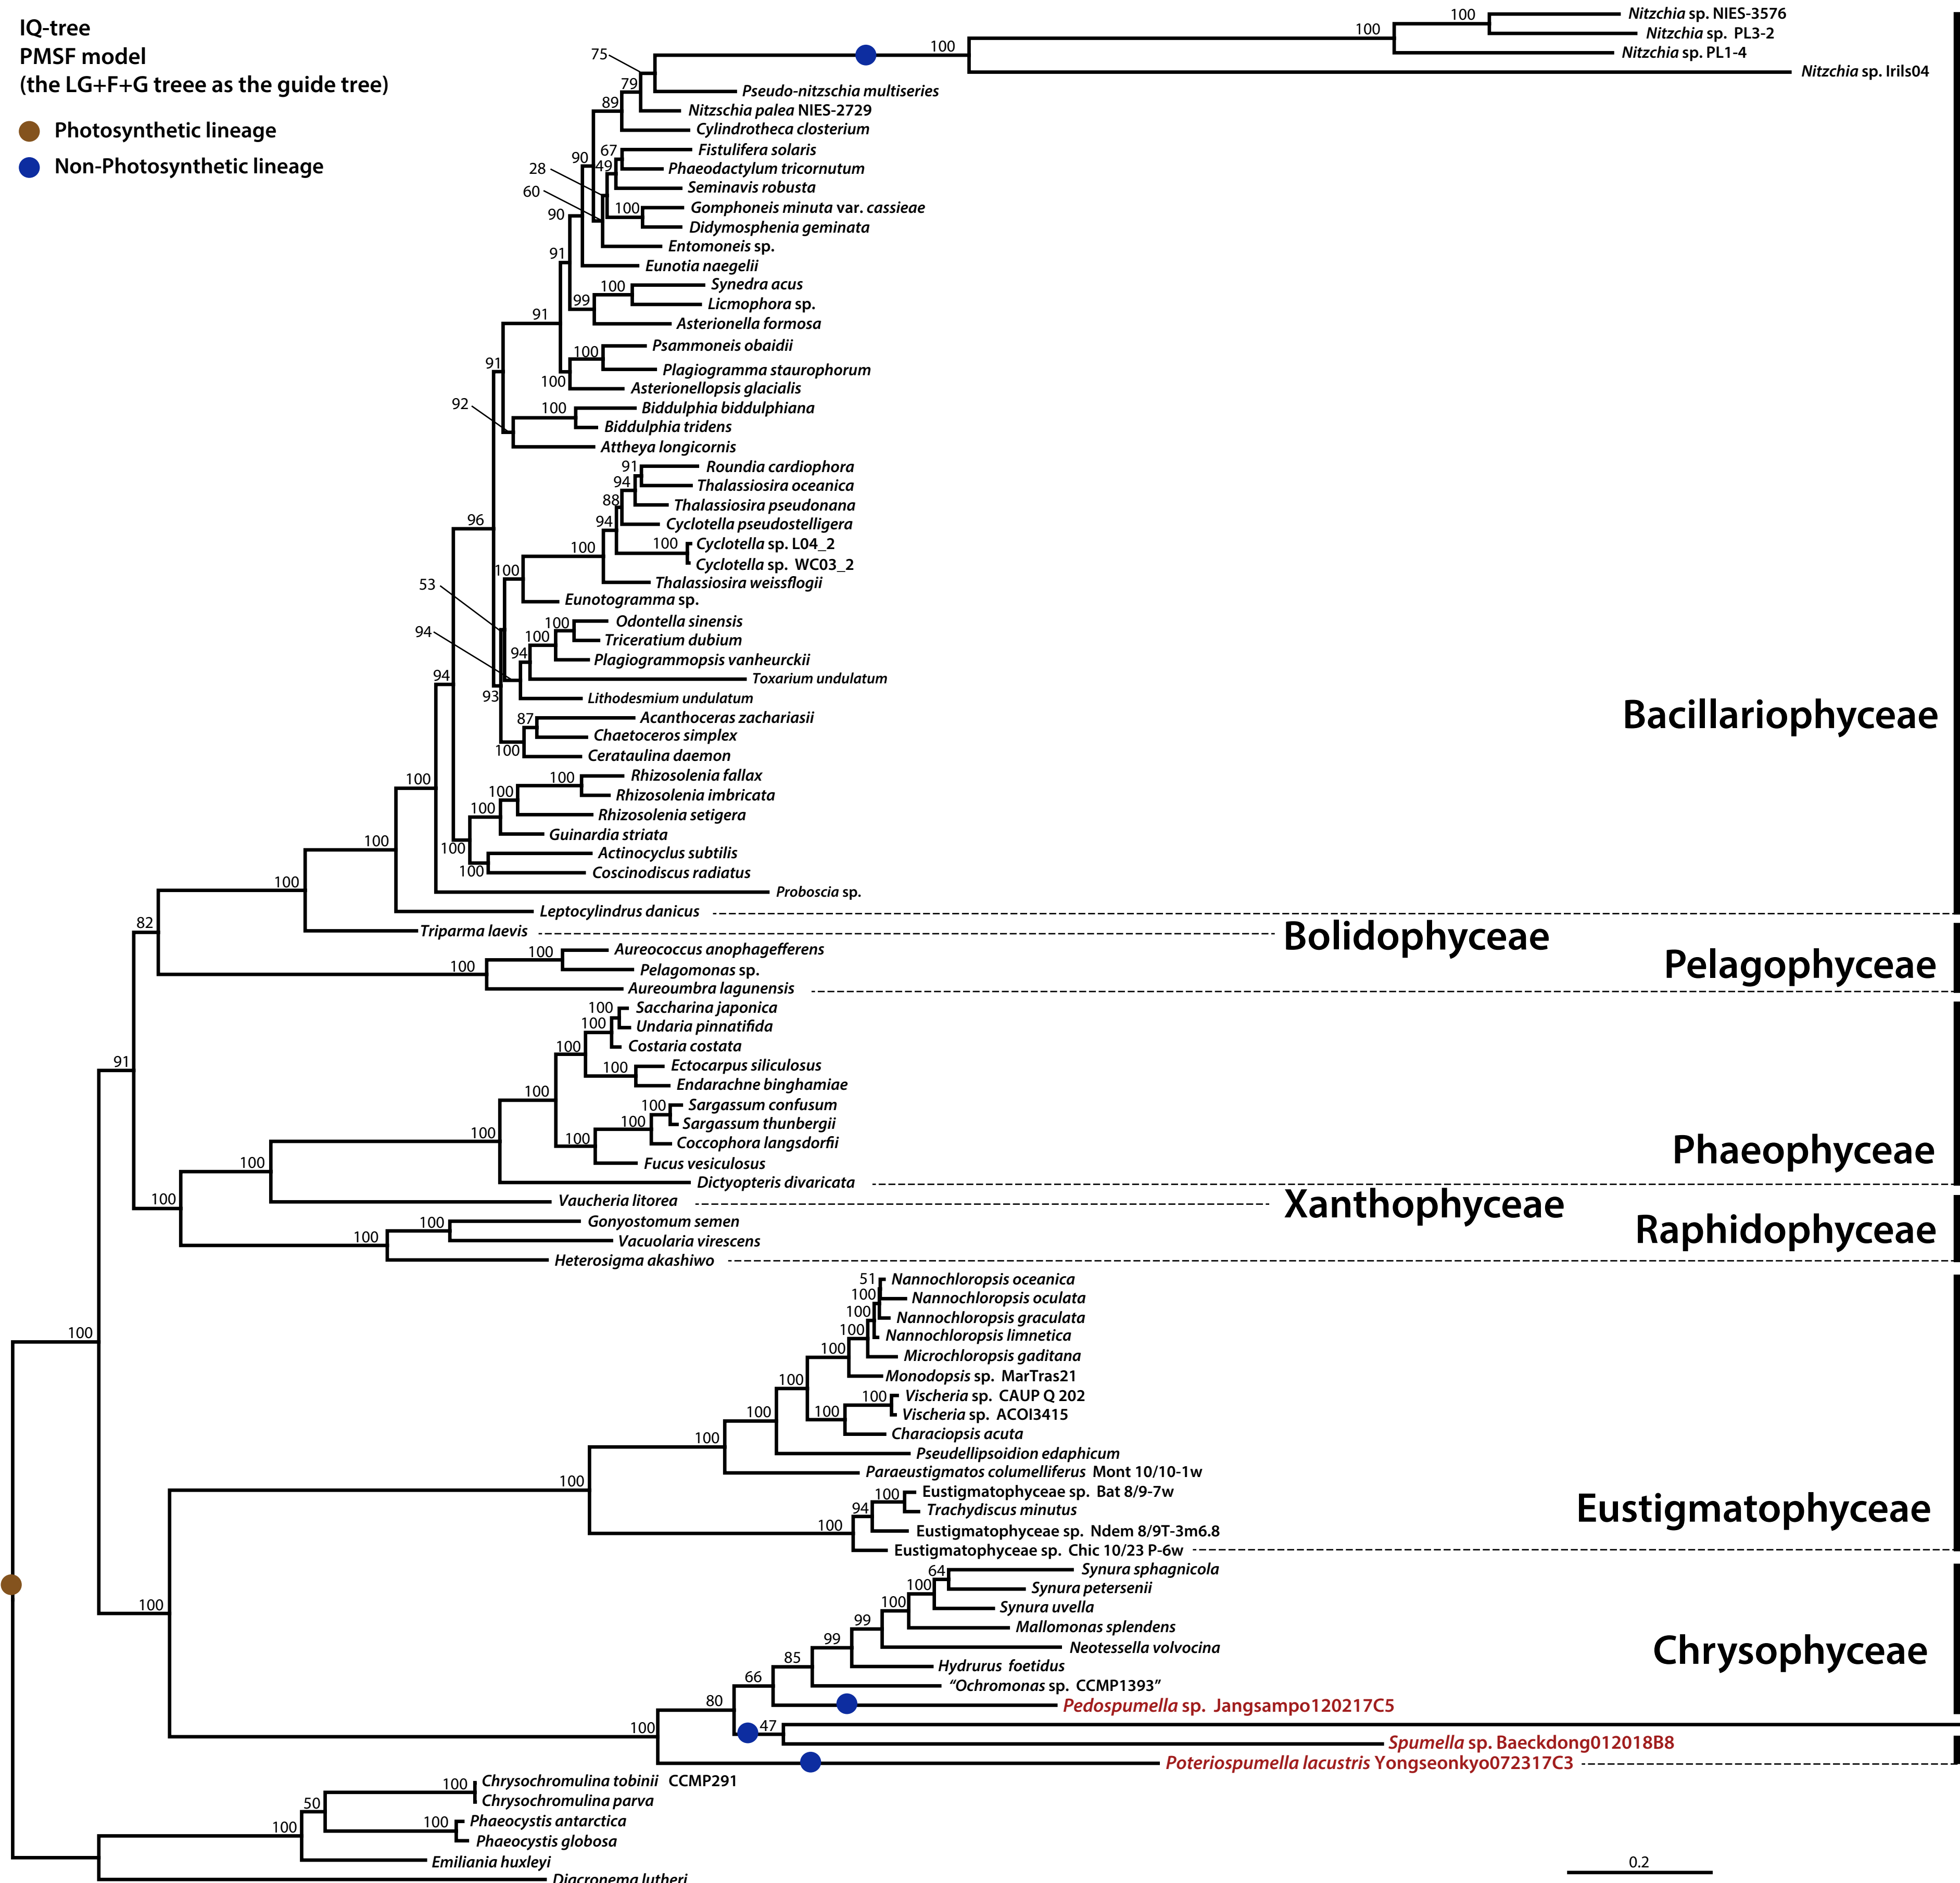

"*Spumella*" sp. NIES-1846, AP019363

0.2
